# Supplementary material
Source: PubMed Central journal article supplement (PMC5801170)
Supplement: NIHMS924007-supplement-Supp_info.pdf [file NIHMS924007-supplement-Supp_info.pdf]

## A. Supporting Information

### A.1. Source-Specific Probabilities of Infection

To estimate source-specific VE, we define  $\lambda_{iH}$  and  $\lambda_{iC}$  as the probability that person  $i$  is infected from a household (H) or community (C) contact during the study, respectively. The source-specific probabilities of infection during the study can be written in terms of the daily probabilities of infection. The source-specific probabilities of being infected on day  $d$  are:

$$\begin{aligned} \mathbb{P}(\text{Infected from the household on day } d) &= [1 - (1 - \beta_v)^{m_{id}}] (1 - \gamma_v \cdot p(d)) \cdot \psi_{i0(d-1)} \\ \mathbb{P}(\text{Infected from the community on day } d) &= (1 - \beta_v)^{m_{id}} \gamma_v \cdot p(d) \cdot \psi_{i0(d-1)} \end{aligned}$$

The probabilities of being infected during the study can be expressed as the sum of the daily probabilities of infection,

$$\begin{aligned} \lambda_{iH} &= \sum_{d=1}^D \{ [1 - (1 - \beta_v)^{m_{id}}] (1 - \gamma_v \cdot p(d)) \cdot \psi_{i0(d-1)} \} \\ \lambda_{iC} &= \sum_{d=1}^D \{ (1 - \beta_v)^{m_{id}} \gamma_v \cdot p(d) \cdot \psi_{i0(d-1)} \} \end{aligned}$$

When estimating the VEs we ignore the possibility of co-infection and assume that a person can only be infected once during the study.

### A.2. Model Adequacy

**Table A1.** Frequencies of cases per household size from 200 simulated influenza outbreaks using the Michigan Study data as input

| # of cases | 0      | 1     | 2    | 3    | 4    | 5    | 6    |
|------------|--------|-------|------|------|------|------|------|
| HH Size    | 124.70 | 30.87 | 8.36 | 1.83 | 0.25 | 0    | 0    |
| 4          | 71.07  | 19.86 | 6.09 | 1.57 | 0.38 | 0.04 | 0    |
| 5          | 25.60  | 7.73  | 2.61 | 0.83 | 0.21 | 0.04 | 0    |
| 6          | 8.63   | 2.59  | 1.09 | 0.48 | 0.19 | 0.05 | 0.01 |
| 7          | 2.45   | 0.96  | 0.38 | 0.15 | 0.05 | 0.02 | 0    |
| 8          | 0      | 0     | 0    | 0    | 0    | 0    | 0    |
| 9          | 1.04   | 0.37  | 0.25 | 0.14 | 0.12 | 0.07 | 0.02 |
| 10         |        |       |      |      |      |      |      |

Using the estimated transmission parameters from the data analysis as input for our simulation program, we obtained mean number of cases per household size from 200 influenza outbreak simulations.

**Table A2.** Observed frequencies of cases per household size from the Michigan Study

| HH Size | # of cases |    |   |   |   |   |   |
|---------|------------|----|---|---|---|---|---|
|         | 0          | 1  | 2 | 3 | 4 | 5 | 6 |
| 4       | 129        | 26 | 8 | 2 | 1 | 0 | 0 |
| 5       | 77         | 17 | 3 | 2 | 0 | 0 | 0 |
| 6       | 25         | 8  | 1 | 1 | 2 | 0 | 0 |
| 7       | 9          | 3  | 0 | 0 | 0 | 1 | 0 |
| 8       | 3          | 1  | 0 | 0 | 0 | 0 | 0 |
| 9       | 0          | 0  | 0 | 0 | 0 | 0 | 0 |
| 10      | 2          | 0  | 0 | 0 | 0 | 0 | 0 |
